# Supplementary material
Source: bioRxiv or medRxiv preprint supplement (https://www.biorxiv.org/content/biorxiv/early/2020/01/02/2020.01.01.892547.1/DC1/embed/media-1.pdf)
Supplement: Supplementary file [file media-1.pdf]

Supplementary material for White TE. Structural colours reflect individual quality: a meta-analysis.

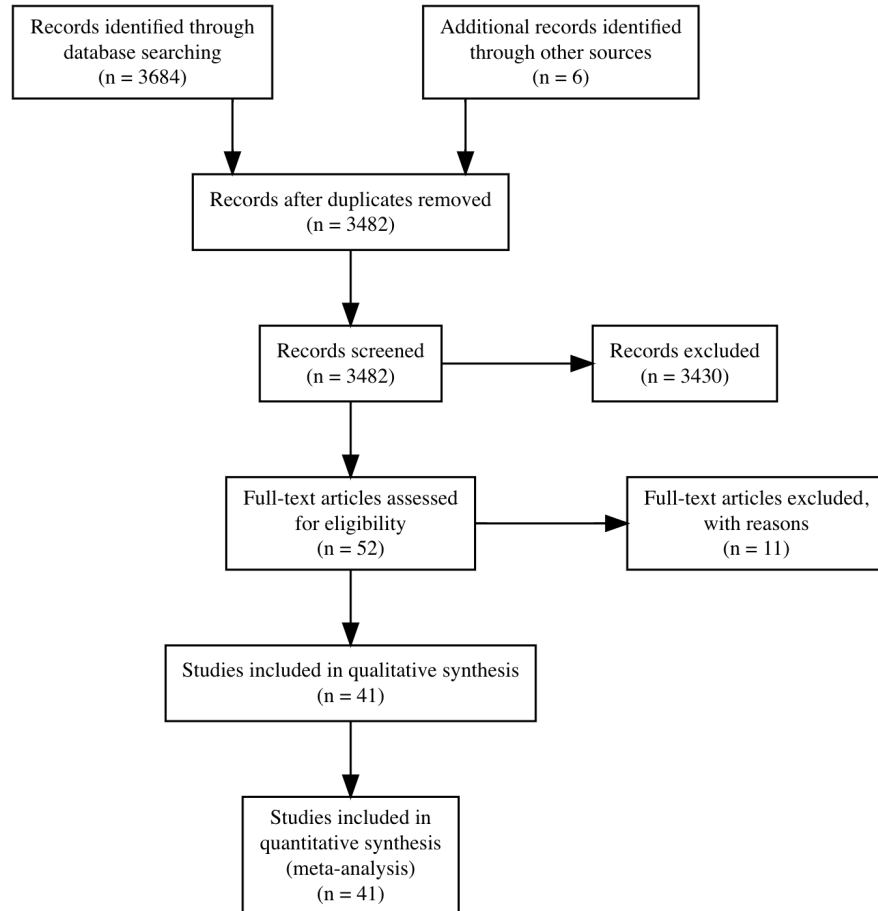

Figure 1: PRISMA diagram depicting the systematic search strategy for literature testing the relationship between the expression of structural colour signals and individual quality.

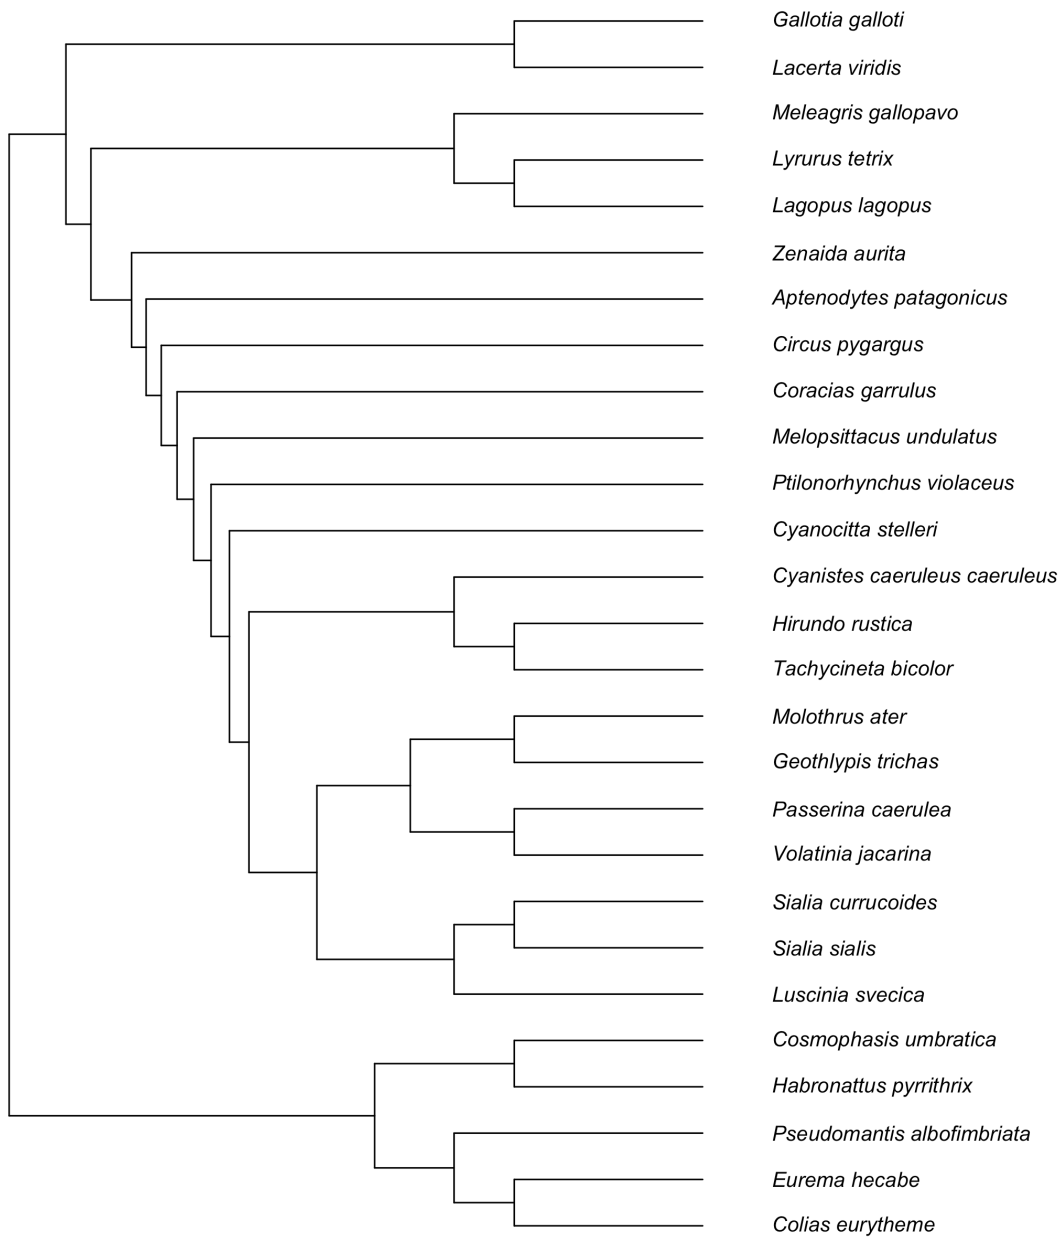

Figure 2: Phylogenetic tree of the taxa included in this study.

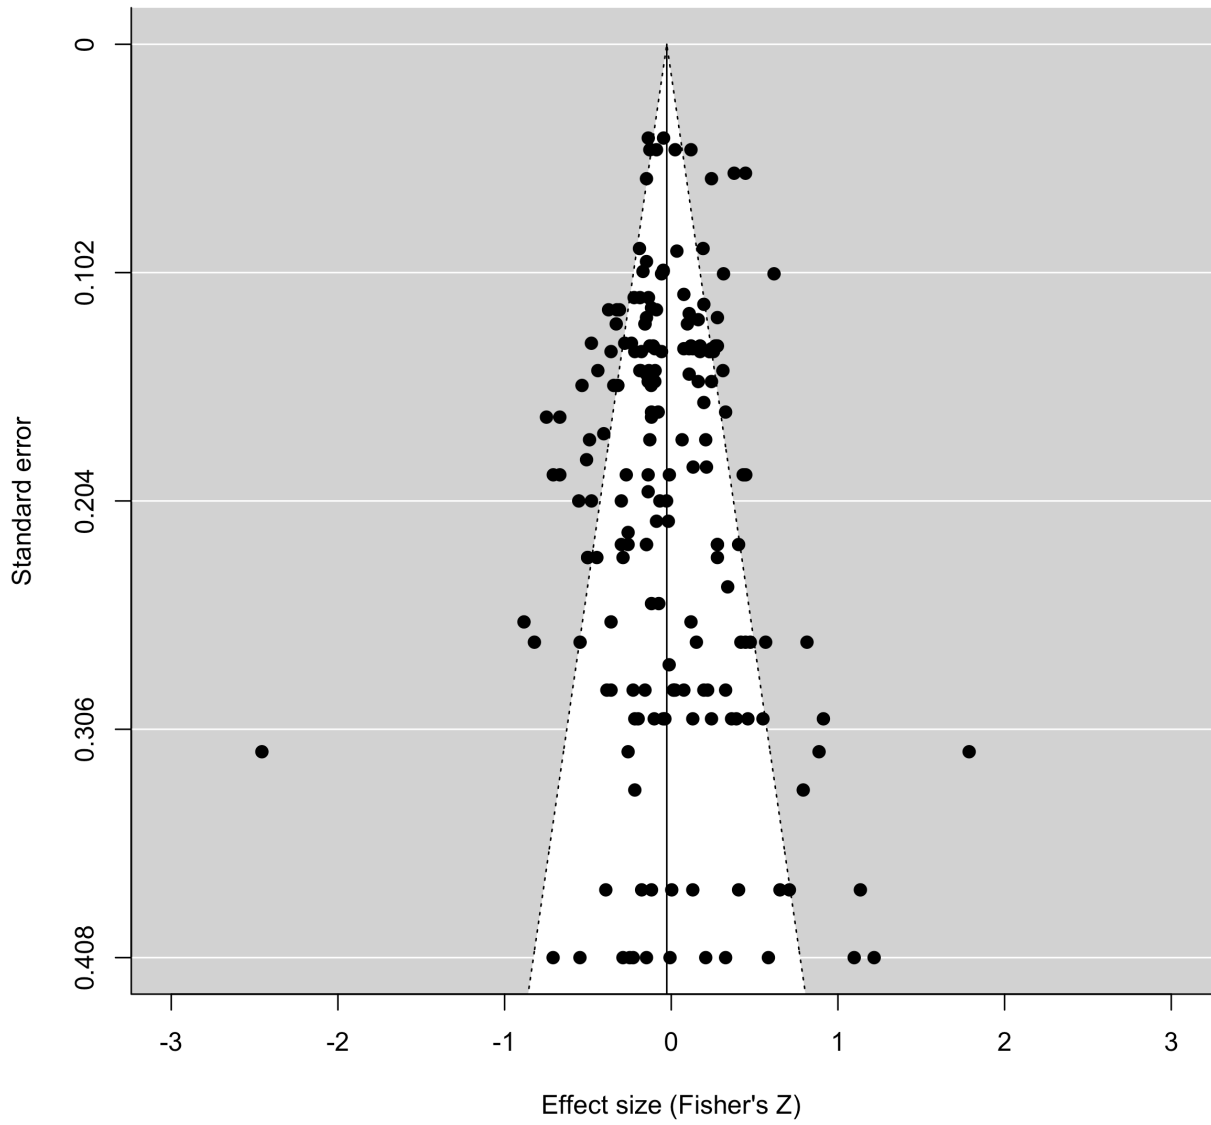

Figure 3: Funnel plots of effect sizes against their standard error, with 95% pseudo confidence interval denoted by dashed lines.

**Table S1:** Full parameter estimates from MLM and MLMR models of the mediators of the correlation between structural colour signal expression and individual quality. Shown are sample sizes, mean Fisher's z values and lower and upper 95% confidence intervals, and heterogeneity.

| <b>Model</b>             | <b>n</b> | <b>Mean (Zr)</b> | <b>Lower CI</b> | <b>Upper CI</b> | <b>I<sup>2</sup> (%)</b> |
|--------------------------|----------|------------------|-----------------|-----------------|--------------------------|
| Overall (intercept-only) | 184      | <b>0.159</b>     | <b>0.087</b>    | <b>0.232</b>    | 81.24                    |
| Quality measure          |          |                  |                 |                 | 80.60                    |
| age                      | 37       | 0.017            | -0.118          | 0.152           |                          |
| body condition           | 103      | <b>0.191</b>     | <b>0.099</b>    | <b>0.284</b>    |                          |
| immune function          | 11       | <b>0.356</b>     | <b>0.126</b>    | <b>0.587</b>    |                          |
| parasite resistance      | 34       | 0.122            | -0.026          | 0.266           |                          |
| Component                |          |                  |                 |                 | 81.59                    |
| achromatic               | 59       | <b>0.172</b>     | <b>0.071</b>    | <b>0.273</b>    |                          |
| chromatic                | 106      | <b>0.154</b>     | <b>0.066</b>    | <b>0.242</b>    |                          |
| combined                 | 20       | 0.150            | -0.033          | 0.333           |                          |
| Sex                      |          |                  |                 |                 | 81.53                    |
| female                   | 29       | 0.121            | -0.014          | 0.257           |                          |
| male                     | 147      | <b>0.170</b>     | <b>0.093</b>    | <b>0.247</b>    |                          |
| combined                 | 9        | 0.125            | -0.131          | 0.381           |                          |
| Optics                   |          |                  |                 |                 | 83.26                    |
| iridescent               | 67       | <b>0.156</b>     | <b>0.013</b>    | <b>0.299</b>    |                          |
| Study type               |          |                  |                 |                 | 81.40                    |
| experimental             | 53       | <b>0.221</b>     | <b>0.109</b>    | <b>0.334</b>    |                          |
| observational            | 132      | <b>0.129</b>     | <b>0.058</b>    | <b>0.200</b>    |                          |
| Control                  |          |                  |                 |                 |                          |
| included                 | 28       | 0.120            | -0.09           | 0.328           | 83.87                    |
